# Supplementary material for: HIV-1 subtypes and drug resistance mutations among female sex workers varied in different cities and regions of the Democratic Republic of Congo
Source: PubMed Central journal article supplement (PMC7012409; doi:10.1371/journal.pone.0228670), 2020-02-11
Supplement: pone.0228670.s001.pdf [file pone.0228670.s001.pdf]

**S1 Table. Number of HIV-1 sequences analyzed using Dried Blood Spots collected from 10 cities in the DRC**

| <b>Cities</b> | <b><i>Pol</i></b> | <b><i>Env</i></b> |
|---------------|-------------------|-------------------|
| Mbuji-Mayi    | 23                | 37                |
| Lubumbashi    | 10                | 18                |
| Kinshasa      | 13                | 22                |
| Goma          | 25                | 32                |
| Kananga       | 4                 | 8                 |
| Kindu         | 2                 | 5                 |
| Kisangani     | 4                 | 5                 |
| Bukavu        | 6                 | 9                 |
| Mbandaka      | 3                 | 5                 |
| Matadi        | 3                 | 4                 |
| <b>Total</b>  | <b>93</b>         | <b>145</b>        |
